# Supplementary material for: The distributions of protein coding genes within chromatin domains in relation to human disease
Source: PubMed Central journal article supplement (PMC6894242; doi:10.1186/s13072-019-0317-2), 2019-12-05

# Housekeeping genes

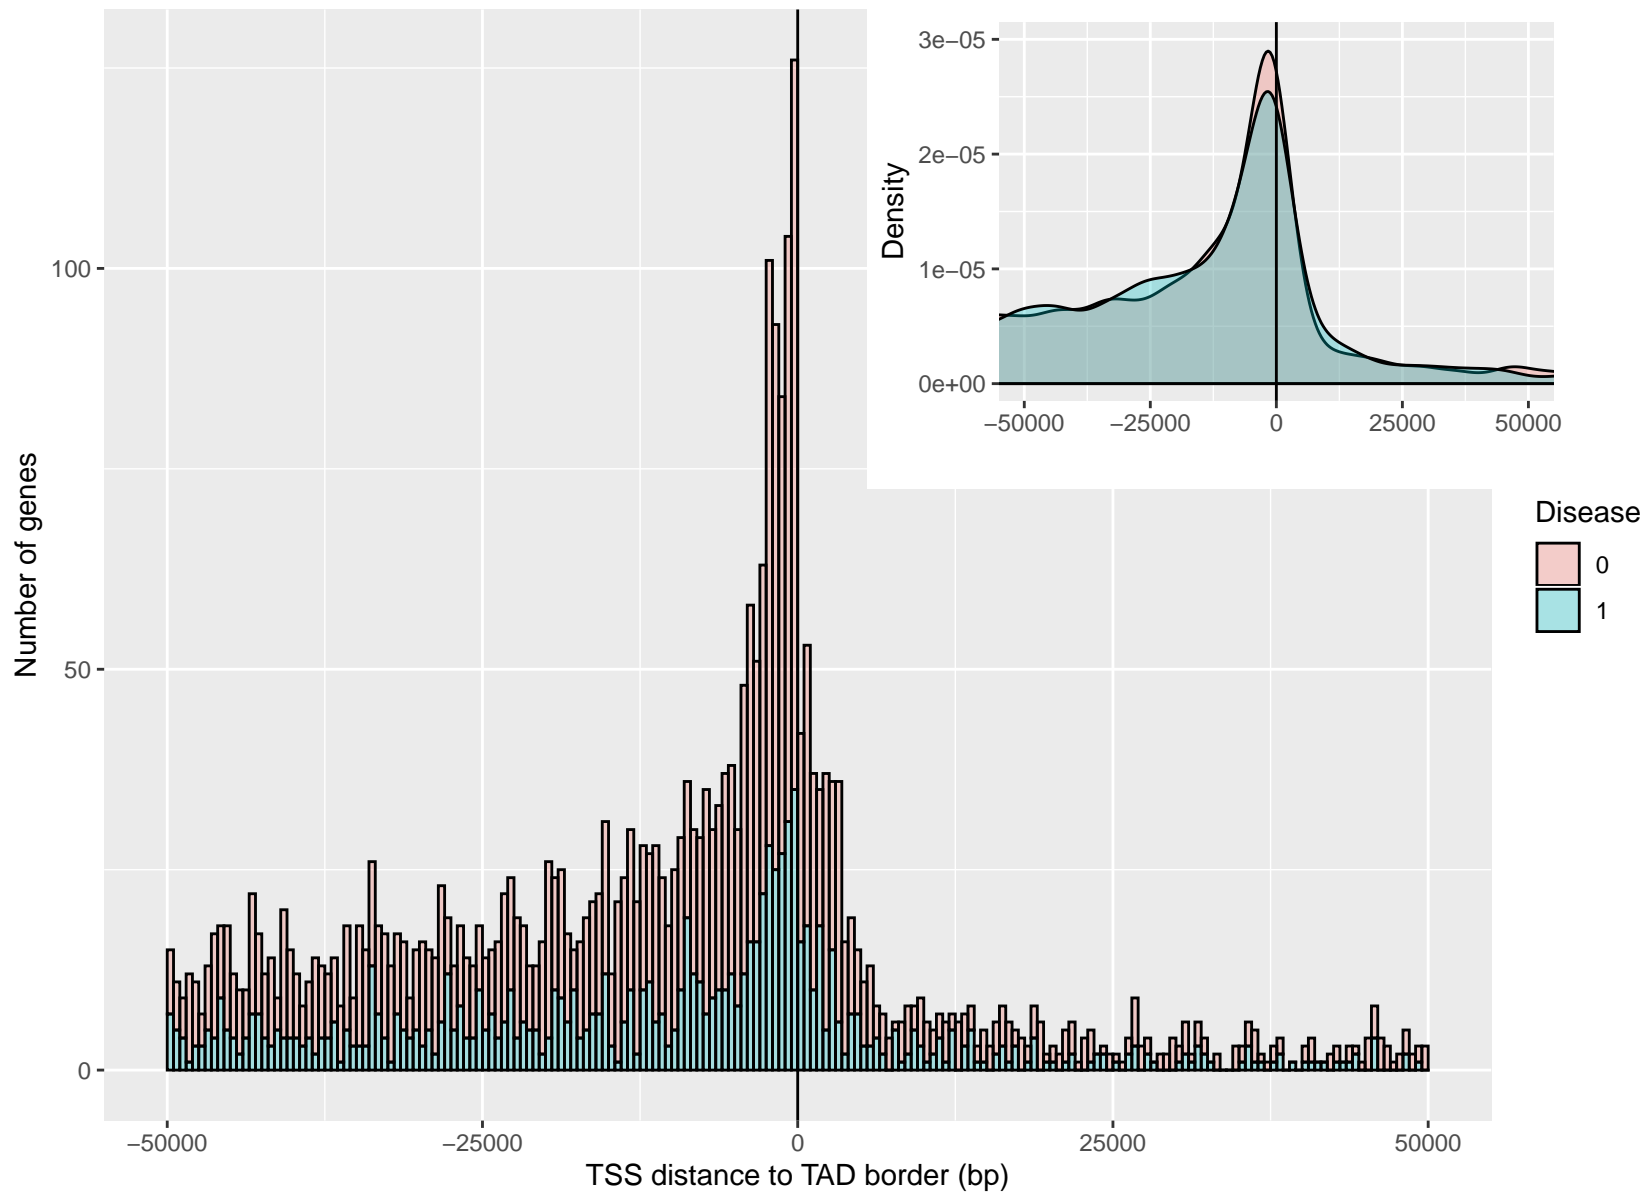

# Any protein coding gene but housekeeping

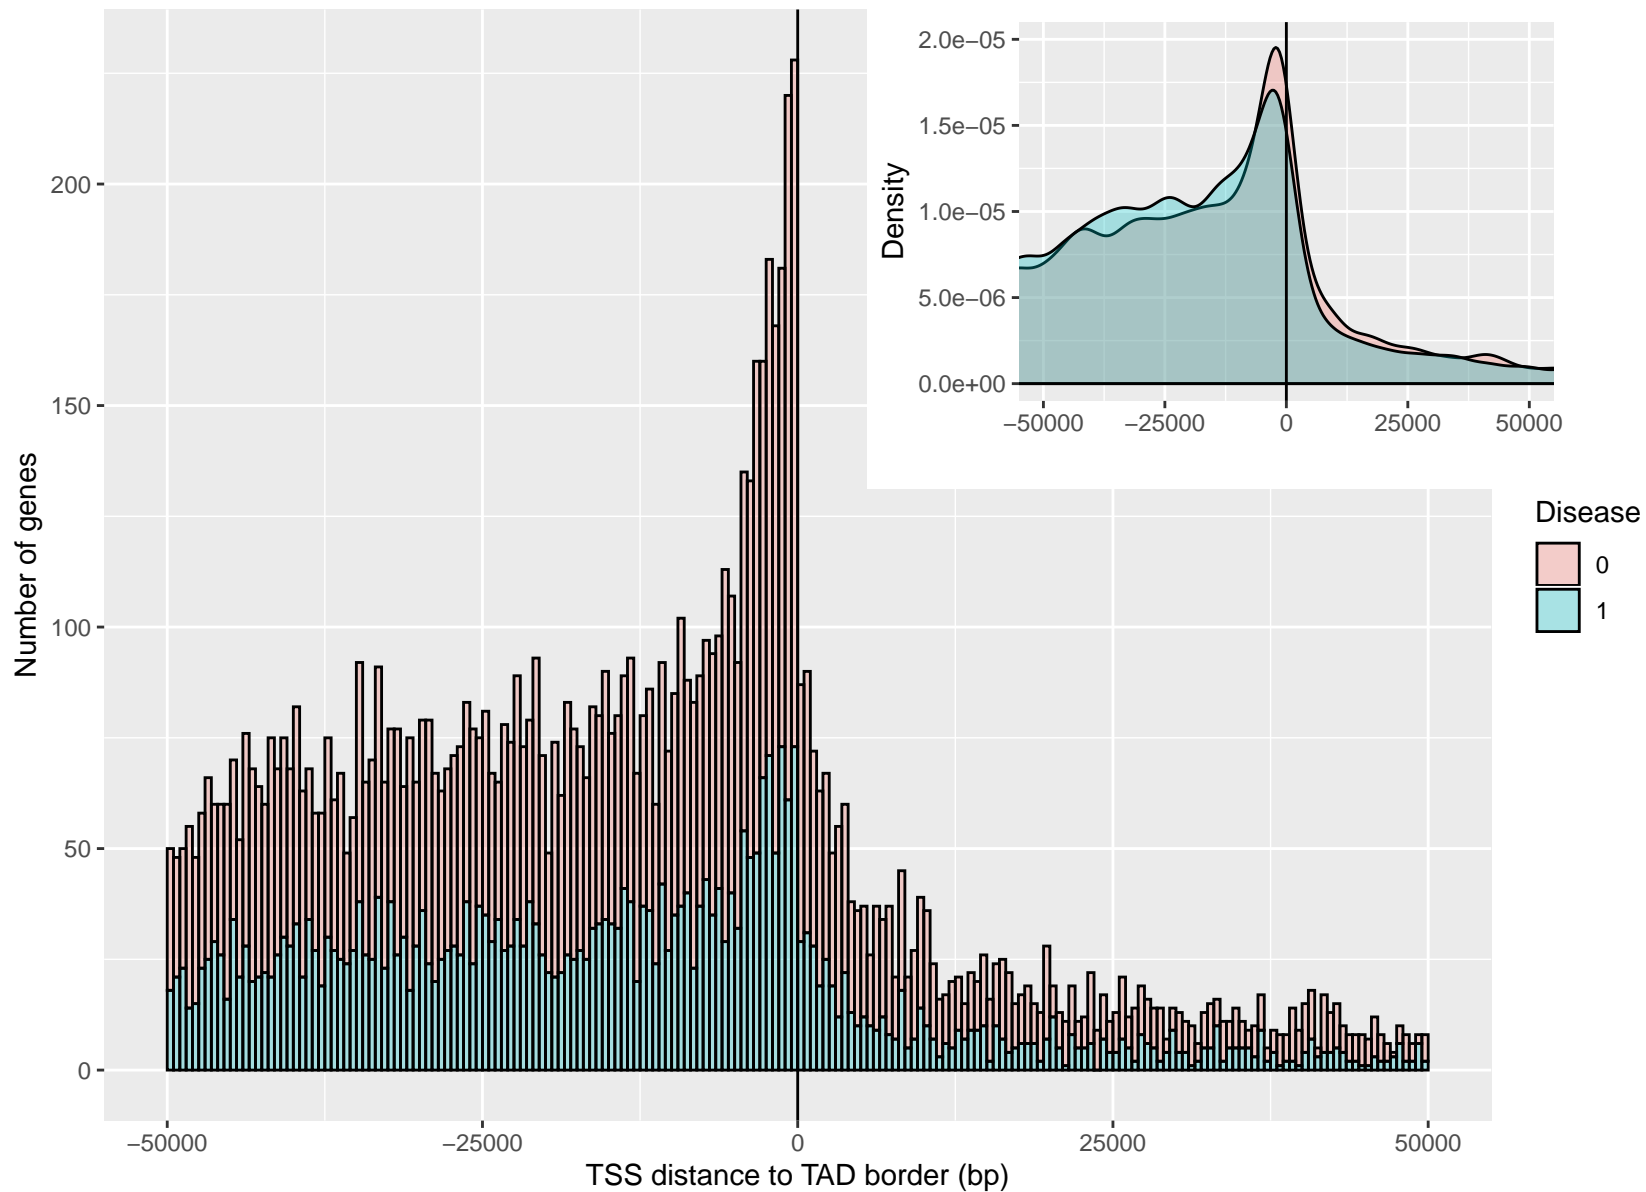

Supplement: 13072_2019_317_MOESM2_ESM.pdf [file 13072_2019_317_MOESM2_ESM.pdf]
